# Supplementary material for: Early Plant Learning in Fiji
Source: Springer Nature journal article supplement (doi:10.1007/s12110-021-09389-6), 2021-03-01
Supplement: MOESM1 [file 12110_2021_9389_MOESM1_ESM.pdf]

## Early Plant Learning in Fiji

Rita Anne McNamara and Annie E. Wertz

Email: rita.mcnamara@vuw.ac.nz

*Human Nature* 32(1), 2021, <https://doi.org/10.1007/s12110-021-09389-6>

|                                                                                          |    |
|------------------------------------------------------------------------------------------|----|
| S1. Study 1: Interview Questions.....                                                    | 2  |
| S1.1. Interview 1: Plant Plant Uses and Knowledge.....                                   | 2  |
| S1.2. Interview 2: Parent Expectations of Child Interactions with Plants .....           | 2  |
| S2. Study 2: Hypothesis 1 .....                                                          | 4  |
| S3. Study 2: Hypothesis 2 .....                                                          | 8  |
| S4. Study 2: Hypothesis 3.....                                                           | 9  |
| S5. Correlations between Touch Latency, Social Look Duration, and Caregiver Interviews . | 13 |
| S5.1. Caregiver Interview Items.....                                                     | 13 |
| S5.2. Stimulus item familiarity .....                                                    | 15 |
| S5.3. Correlation Tables.....                                                            | 16 |

## **S1. Study 1: Interview Questions**

Each of these questions asks for free listing of items that fall into the domains of each question.

### **S1.1. Interview 1: Plant Plant Uses and Knowledge**

- Garden = What kinds of plants do you grow in your garden near your house?
- Farm = What kinds of plants do you grow at your plantation/ farm (*teitei*)?
- When did you learn = When/ at what age did you first learn to start farming?
- From whom = Who taught you how to farm?
- Wild foods/plants = What kinds of wild foods or plants do you sometimes eat from around the village (e.g. ota, wild uvi, etc.)?
- Traditional medicines = What are some of the traditional medicinal plants that you know of, and how are they used?

### **S1.2. Interview 2: Parent Expectations of Child Interactions with Plants**

- Intro\_3\_Eng = Child activities out of house (Eng Trans)
- Intro\_5\_Eng = What do you warn your child about (English Translation)
- Post\_13\_Fijian & Post\_13\_Eng = Which plants do you stop your child from touching?
- Post\_15\_Fijian & Post\_15\_Eng = Which things do you stop your child from touching?
- Kinds\_29\_Eng = How do children interact with plants?
- Teach\_30\_Y.N = Do you teach child about plants\_Y/N
- Teach\_31\_Fijian & Teach\_31\_Eng = Which plants do you teach them about?
- Teach\_32\_Eng = What kinds of jobs/ chores do children do with plants?

- Teach\_33\_Eng = Do boys and girls do the same jobs/ chores or different? How different?
- Teach\_34\_Eng = How do you teach children to do these jobs/ chores?
- Teach\_35\_Eng = How old are children when they start doing jobs/ chores?
- Teach\_36\_Eng = Who teaches children about plants - only you or others too?  
Which others?
- Teach\_37\_Eng = About what percentage of time do you care for the child and what percent does someone else care for them?

**S2. Study 2: Hypothesis 1**

| Linear Comparisons           | estimate  | Lower CI  | Upper CI | SE       | z-value | p-value |
|------------------------------|-----------|-----------|----------|----------|---------|---------|
| Spoon – Pot                  | -2,061.33 | -5,431.30 | 1,308.63 | 1,065.56 | -1.93   |         |
| Blue - Pot                   | 149.76    | -3,220.21 | 3,519.72 | 1,065.56 | 0.14    |         |
| Green - Pot                  | -65.88    | -3,435.84 | 3,304.09 | 1,065.56 | -0.06   |         |
| Plant 1 - Pot                | -873.21   | -4,243.18 | 2,496.75 | 1,065.56 | -0.82   |         |
| Plant 2 - Pot                | -2,217.82 | -5,587.78 | 1,152.15 | 1,065.56 | -2.08   |         |
| Shell 1 - Pot                | 236.67    | -3,133.30 | 3,606.63 | 1,065.56 | 0.22    |         |
| Shell 2 - Pot                | -964.73   | -4,334.69 | 2,405.24 | 1,065.56 | -0.91   |         |
| Fabric Plant - Pot           | 326.45    | -3,043.51 | 3,696.42 | 1,065.56 | 0.31    |         |
| Plastic Plant - Pot          | 1,403.03  | -1,966.94 | 4,773    | 1,065.56 | 1.32    |         |
| Blue - Spoon                 | 2,211.09  | -1,158.87 | 5,581.06 | 1,065.56 | 2.08    |         |
| Green - Spoon                | 1,995.45  | -1,374.51 | 5,365.42 | 1,065.56 | 1.87    |         |
| Plant 1 - Spoon              | 1,188.12  | -2,181.84 | 4,558.09 | 1,065.56 | 1.12    |         |
| Plant 2 - Spoon              | -156.48   | -3,526.45 | 3,213.48 | 1,065.56 | -0.15   |         |
| Shell 1 - Spoon              | 2,298     | -1,071.97 | 5,667.97 | 1,065.56 | 2.16    |         |
| Shell 2 - Spoon              | 1,096.61  | -2,273.36 | 4,466.57 | 1,065.56 | 1.03    |         |
| Fabric Plant - Spoon         | 2,387.79  | -982.18   | 5,757.75 | 1,065.56 | 2.24    |         |
| Plastic Plant - Spoon        | 3,464.36  | 94.40     | 6,834.33 | 1,065.56 | 3.25    | 0.04*   |
| Green - Blue                 | -215.64   | -3,585.60 | 3,154.33 | 1,065.56 | -0.20   |         |
| Plant 1 - Blue               | -1,022.97 | -4,392.94 | 2,347    | 1,065.56 | -0.96   |         |
| Plant 2 - Blue               | -2,367.58 | -5,737.54 | 1,002.39 | 1,065.56 | -2.22   |         |
| Shell 1 - Blue               | 86.91     | -3,283.06 | 3,456.87 | 1,065.56 | 0.08    |         |
| Shell 2 - Blue               | -1,114.48 | -4,484.45 | 2,255.48 | 1,065.56 | -1.05   |         |
| Fabric Plant - Blue          | 176.70    | -3,193.27 | 3,546.66 | 1,065.56 | 0.17    |         |
| Plastic Plant - Blue         | 1,253.27  | -2,116.69 | 4,623.24 | 1,065.56 | 1.18    |         |
| Plant 1 - Green              | -807.33   | -4,177.30 | 2,562.63 | 1,065.56 | -0.76   |         |
| Plant 2 - Green              | -2,151.94 | -5,521.91 | 1,218.03 | 1,065.56 | -2.02   |         |
| Shell 1 - Green              | 302.55    | -3,067.42 | 3,672.51 | 1,065.56 | 0.28    |         |
| Shell 2 - Green              | -898.85   | -4,268.81 | 2,471.12 | 1,065.56 | -0.84   |         |
| Fabric Plant - Green         | 392.33    | -2,977.63 | 3,762.30 | 1,065.56 | 0.37    |         |
| Plastic Plant - Green        | 1,468.91  | -1,901.06 | 4,838.87 | 1,065.56 | 1.38    |         |
| Plant 2 - Plant 1            | -1,344.61 | -4,714.57 | 2,025.36 | 1,065.56 | -1.26   |         |
| Shell 1 - Plant 1            | 1,109.88  | -2,260.09 | 4,479.84 | 1,065.56 | 1.04    |         |
| Shell 2 - Plant 1            | -91.52    | -3,461.48 | 3,278.45 | 1,065.56 | -0.09   |         |
| Fabric Plant - Plant 1       | 1,199.67  | -2,170.30 | 4,569.63 | 1,065.56 | 1.13    |         |
| Plastic Plant - Plant 1      | 2,276.24  | -1,093.72 | 5,646.21 | 1,065.56 | 2.14    |         |
| Shell 1 - Plant 2            | 2,454.48  | -915.48   | 5,824.45 | 1,065.56 | 2.30    |         |
| Shell 2 - Plant 2            | 1,253.09  | -2,116.87 | 4,623.06 | 1,065.56 | 1.18    |         |
| Fabric Plant - Plant 2       | 2,544.27  | -825.69   | 5,914.24 | 1,065.56 | 2.39    |         |
| Plastic Plant - Plant 2      | 3,620.85  | 250.88    | 6,990.81 | 1,065.56 | 3.40    | 0.02*   |
| Shell 2 - Shell 1            | -1,201.39 | -4,571.36 | 2,168.57 | 1,065.56 | -1.13   |         |
| Fabric Plant - Shell 1       | 89.79     | -3,280.18 | 3,459.75 | 1,065.56 | 0.08    |         |
| Plastic Plant - Shell 1      | 1,166.36  | -2,203.60 | 4,536.33 | 1,065.56 | 1.09    |         |
| Fabric Plant - Shell 2       | 1,291.18  | -2,078.78 | 4,661.15 | 1,065.56 | 1.21    |         |
| Plastic Plant - Shell 2      | 2,367.76  | -1,002.21 | 5,737.72 | 1,065.56 | 2.22    |         |
| Plastic Plant - Fabric Plant | 1,076.58  | -2,293.39 | 4,446.54 | 1,065.56 | 1.01    |         |

Table S1 Tukey's all-pair comparisons for estimates of time-to-touch latencies across objects. Only significant differences are between spoon (faster) v. plastic artificial plant and plant 2 (mango tree; faster) v. plastic artificial plant.

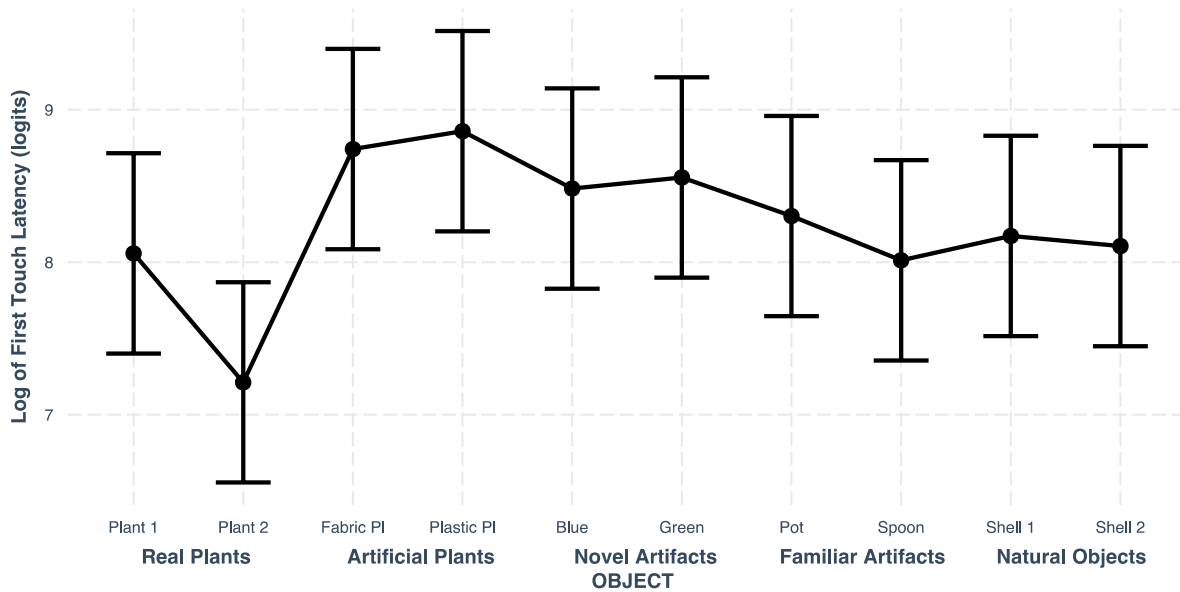

Figure S1 Least squares means of Log Transformed Touch Latency across objects. Error bars show .95 CI. Children touch Plant 2 (mango) significantly faster than Blue Novel Artificial object (Plant 2 – Blue = -1.27,  $SE = 0.36$ ,  $p = 0.02$ ), Green Novel Artificial object (Plant 2 – Green = -1.34,  $SE = 0.36$ ,  $p < 0.001$ ), and both artificial plants (Plant 2 – Fabric = -1.53,  $SE = 0.36$ ,  $p < 0.001$ ; Plant 2 – Plastic = -1.65,  $SE = 0.36$ ,  $p < 0.001$ ) in Tukey’s all-pair comparisons.

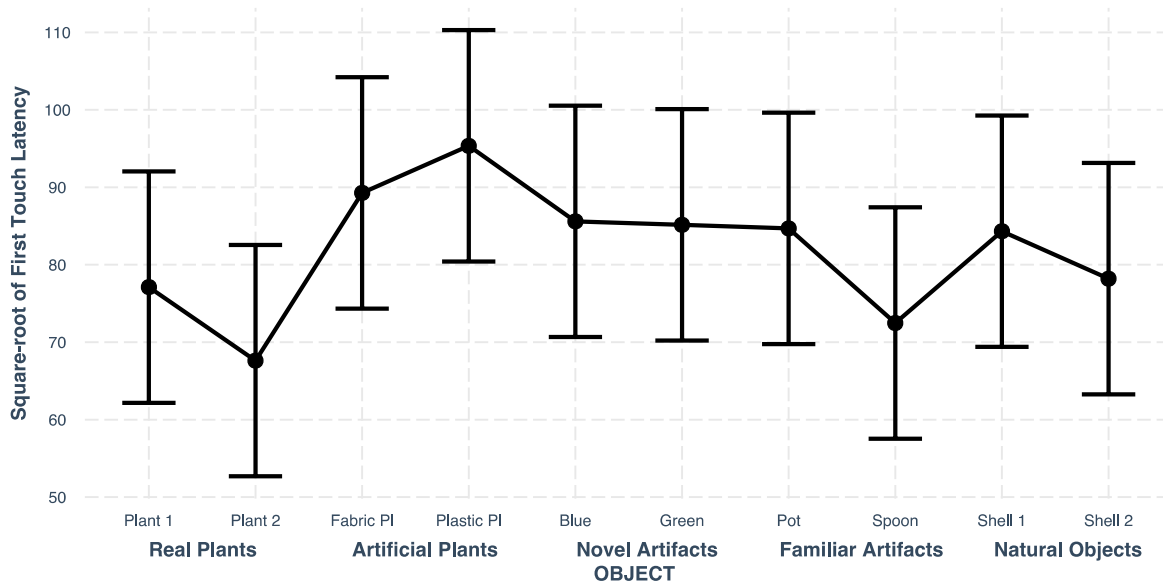

Figure S2 Least squares means of Square Root Transformed Touch Latency. Error bars show .95 CI. Children touch Plant 2 (mango) significantly faster than the Plastic Artificial Plant (Plant 2 – Plastic = -27.76,  $SE = 7.13$ ,  $p < 0.01$ ), and they touch the Spoon faster than the Plastic Artificial Plant (Spoon – Plastic = -22.87,  $SE = 7.13$ ,  $p = 0.04$ ) in Tukey’s all-pair comparisons.

|                             | Touch Latency                                            |                                                   |                                                         |
|-----------------------------|----------------------------------------------------------|---------------------------------------------------|---------------------------------------------------------|
|                             | <u>Untransformed</u><br><i>Estimate (raw)</i><br>[.95CI] | <u>Log</u><br><i>Estimate (logits)</i><br>[.95CI] | <u>Square Root</u><br><i>Estimate (sqrt)</i><br>[.95CI] |
| Plant 1: Coconut Palm       | 8,159.09***<br>[5,939.32, 10,378.87]                     | 8.06***<br>[7.40, 8.71]                           | 77.11***<br>[62.23, 91.99]                              |
| Plant 2: Mango Tree         | 6,814.48***<br>[4,594.71, 9,034.26]                      | 7.21***<br>[6.56, 7.87]                           | 67.62***<br>[52.74, 82.50]                              |
| Artificial Plant: Fabric    | 9,358.76***<br>[7,138.98, 11,578.53]                     | 8.74***<br>[8.09, 9.40]                           | 89.28***<br>[74.40, 104.16]                             |
| Artificial Plant: Plastic   | 10,435.33***<br>[8,215.56, 12,655.11]                    | 8.86***<br>[8.20, 9.51]                           | 95.35***<br>[80.47, 110.23]                             |
| Novel Artificial: Blue      | 9,182.06***<br>[6,962.29, 11,401.84]                     | 8.48***<br>[7.83, 9.14]                           | 85.60***<br>[70.72, 100.48]                             |
| Novel Artificial: Green     | 8,966.42***<br>[6,746.65, 11,186.20]                     | 8.56***<br>[7.90, 9.21]                           | 85.15***<br>[70.27, 100.03]                             |
| Familiar Artificial: Pot    | 9,032.30***<br>[6,812.53, 11,252.08]                     | 8.30***<br>[7.65, 8.96]                           | 84.69***<br>[69.81, 99.57]                              |
| Familiar Artificial: Spoon  | 6,970.97***<br>[4,751.19, 9,190.74]                      | 8.01***<br>[7.36, 8.67]                           | 72.48***<br>[57.60, 87.36]                              |
| Shell 1: Conch              | 9,268.97***<br>[7,049.19, 11,488.74]                     | 8.17***<br>[7.52, 8.83]                           | 84.33***<br>[69.45, 99.21]                              |
| Shell 2: Nautilus           | 8,067.58***<br>[5,847.80, 10,287.35]                     | 8.11***<br>[7.45, 8.76]                           | 78.20***<br>[63.32, 93.08]                              |
| Observations                | 330                                                      | 330                                               | 330                                                     |
| Shapiro-Wilk Normality Test | 0.98***                                                  | 0.81***                                           | 0.98**                                                  |
| Log Likelihood              | -3,192.64                                                | -627.48                                           | -1,590.42                                               |
| Akaike Inf. Crit.           | 6,409.27                                                 | 1,278.95                                          | 3,204.84                                                |
| Bayesian Inf. Crit.         | 6,454.86                                                 | 1,324.54                                          | 3,250.43                                                |

Note: †p<0.1; \*p<0.05; \*\*p<0.01; \*\*\*p<0.001

Table S2 Comparison between untransformed raw touch latencies vs. log and square-root transformations for Hypothesis 1.

| Coef                       | Untransformed Latency<br>Estimate (SE)      | Robust Regression<br>Estimate (SE) |
|----------------------------|---------------------------------------------|------------------------------------|
| (Intercept) Plant 1        | 8159.1 (1133)                               | 8732.4 (1259)                      |
| Plant 1 v. Plant 2         | -1344.6 (1066)                              | -782.8 ( 652)                      |
| Plant 1 v. Fabric Plant    | 1199.7 (1066)                               | 745.2 ( 652)                       |
| Plant 1 v. Plastic Plant   | 2276.2 (1066)                               | 1177.6 ( 652)                      |
| Plant 1 v. Blue            | 1023.0 (1066)                               | 238.4 ( 652)                       |
| Plant 1 v. Green           | 807.3 (1066)                                | 284.0 ( 652)                       |
| Plant 1 v. Pot             | 873.2 (1066)                                | 45.8 ( 652)                        |
| Plant 1 v. Spoon           | -1188.1 (1066)                              | -982.9 ( 652)                      |
| Plant 1 v. Shell 1         | 1109.9 (1066)                               | 673.0 ( 652)                       |
| Plant 1 v. Shell 2         | -91.5 (1066)                                | -378.4 ( 652)                      |
| <u>Variance Components</u> |                                             |                                    |
| (Intercept) Individuals    | 4857                                        | 6561                               |
| sigma                      | 4328                                        | 2582                               |
| REML                       | 6385                                        |                                    |
| rho.e                      | smoothed Huber (k = 1.35, s=10)             |                                    |
| rho.sigma.e                | smoothed Huber, Proposal II (k=1.345, s=10) |                                    |
| rho.b_1                    | smoothed Huber (k=1.345, s=10)              |                                    |
| rho.sigma.b_1              | smoothed Huber, Proposal II (k=1.345, s=10) |                                    |

Table S3 Comparison between untransformed raw latencies and robust hierarchical regression for Hypothesis 1.

**S3. Study 2: Hypothesis 2**

| Linear Comparisons           | estimate | Lower CI | Upper CI | SE   | z-value | p-value |
|------------------------------|----------|----------|----------|------|---------|---------|
| Fabric Plant - Blue          | 0.43     | 0.07     | 0.88     | 0.71 | -0.38   |         |
| Plastic Plant - Blue         | 0.17     | 0.02     | 0.68     | 0.76 | -2.14   |         |
| Green - Blue                 | 0.37     | 0.06     | 0.85     | 0.72 | -0.73   |         |
| Plant 1 - Blue               | 0.68     | 0.18     | 0.95     | 0.72 | 1.04    |         |
| Plant 2 - Blue               | 0.73     | 0.22     | 0.96     | 0.72 | 1.39    |         |
| Pot - Blue                   | 0.62     | 0.15     | 0.94     | 0.71 | 0.69    |         |
| Shell 1 - Blue               | 0.37     | 0.06     | 0.85     | 0.72 | -0.74   |         |
| Shell 2 - Blue               | 0.68     | 0.18     | 0.95     | 0.72 | 1.04    |         |
| Spoon - Blue                 | 0.86     | 0.36     | 0.99     | 0.76 | 2.41    |         |
| Plastic Plant - Fabric Plant | 0.21     | 0.02     | 0.74     | 0.75 | -1.79   |         |
| Green - Fabric Plant         | 0.44     | 0.07     | 0.88     | 0.72 | -0.36   |         |
| Plant 1 - Fabric Plant       | 0.73     | 0.22     | 0.96     | 0.72 | 1.41    |         |
| Plant 2 - Fabric Plant       | 0.78     | 0.26     | 0.97     | 0.73 | 1.75    |         |
| Pot - Fabric Plant           | 0.68     | 0.18     | 0.95     | 0.72 | 1.06    |         |
| Shell 1 - Fabric Plant       | 0.44     | 0.07     | 0.88     | 0.72 | -0.36   |         |
| Shell 2 - Fabric Plant       | 0.73     | 0.22     | 0.96     | 0.72 | 1.41    |         |
| Spoon - Fabric Plant         | 0.89     | 0.42     | 0.99     | 0.76 | 2.75    |         |
| Green - Plastic Plant        | 0.75     | 0.22     | 0.97     | 0.75 | 1.45    |         |
| Plant 1 - Plastic Plant      | 0.91     | 0.48     | 0.99     | 0.77 | 3.06    | 0.07†   |
| Plant 2 - Plastic Plant      | 0.93     | 0.54     | 0.99     | 0.78 | 3.35    | 0.03*   |
| Pot - Plastic Plant          | 0.89     | 0.42     | 0.99     | 0.77 | 2.75    |         |
| Shell 1 - Plastic Plant      | 0.75     | 0.22     | 0.97     | 0.75 | 1.45    |         |
| Shell 2 - Plastic Plant      | 0.91     | 0.48     | 0.99     | 0.77 | 3.05    | 0.07†   |
| Spoon - Plastic Plant        | 0.97     | 0.70     | 1        | 0.82 | 4.18    | 0***    |
| Plant 1 - Green              | 0.78     | 0.26     | 0.97     | 0.73 | 1.75    |         |
| Plant 2 - Green              | 0.82     | 0.31     | 0.98     | 0.73 | 2.09    |         |
| Pot - Green                  | 0.73     | 0.22     | 0.96     | 0.72 | 1.41    |         |
| Shell 1 - Green              | 0.50     | 0.09     | 0.91     | 0.72 | 0       |         |
| Shell 2 - Green              | 0.78     | 0.26     | 0.97     | 0.73 | 1.75    |         |
| Spoon - Green                | 0.91     | 0.48     | 0.99     | 0.77 | 3.05    | 0.07†   |
| Plant 2 - Plant 1            | 0.56     | 0.12     | 0.93     | 0.72 | 0.36    |         |
| Pot - Plant 1                | 0.44     | 0.07     | 0.88     | 0.71 | -0.36   |         |
| Shell 1 - Plant 1            | 0.22     | 0.03     | 0.74     | 0.73 | -1.75   |         |
| Shell 2 - Plant 1            | 0.50     | 0.09     | 0.91     | 0.72 | 0       |         |
| Spoon - Plant 1              | 0.75     | 0.22     | 0.97     | 0.75 | 1.44    |         |
| Pot - Plant 2                | 0.37     | 0.06     | 0.85     | 0.72 | -0.72   |         |
| Shell 1 - Plant 2            | 0.18     | 0.02     | 0.69     | 0.73 | -2.09   |         |
| Shell 2 - Plant 2            | 0.44     | 0.07     | 0.88     | 0.72 | -0.36   |         |
| Spoon - Plant 2              | 0.69     | 0.18     | 0.96     | 0.75 | 1.09    |         |
| Shell 1 - Pot                | 0.27     | 0.04     | 0.78     | 0.72 | -1.41   |         |
| Shell 2 - Pot                | 0.56     | 0.12     | 0.93     | 0.71 | 0.36    |         |
| Spoon - Pot                  | 0.79     | 0.26     | 0.98     | 0.75 | 1.78    |         |
| Shell 2 - Shell 1            | 0.78     | 0.26     | 0.97     | 0.73 | 1.75    |         |
| Spoon - Shell 1              | 0.91     | 0.48     | 0.99     | 0.77 | 3.05    | 0.07†   |
| Spoon - Shell 2              | 0.75     | 0.22     | 0.97     | 0.75 | 1.44    |         |

Table S4 Tukey's all-pair comparisons for estimates (in probabilities) of touch vs. no touch across objects. The only significant differences are between Spoon vs. Plastic Artificial Plant and Plant 2 (mango tree) vs. Plastic Artificial Plant.



**S4. Study 2: Hypothesis 3**

| Linear Comparisons           | estimate  | Lower CI  | Upper CI | SE     | z-value | p-value |
|------------------------------|-----------|-----------|----------|--------|---------|---------|
| Spoon – Pot                  | -593.45   | -1,622.15 | 435.24   | 325.14 | -1.83   |         |
| Blue - Pot                   | -949.94   | -1,978.64 | 78.76    | 325.14 | -2.92   |         |
| Green - Pot                  | -1,203.39 | -2,232.09 | -174.70  | 325.14 | -3.70   | 0.01**  |
| Plant 1 - Pot                | -466.73   | -1,495.42 | 561.97   | 325.14 | -1.44   |         |
| Plant 2 - Pot                | -999.39   | -2,028.09 | 29.30    | 325.14 | -3.07   | 0.07†   |
| Shell 1 - Pot                | -783.03   | -1,811.73 | 245.67   | 325.14 | -2.41   |         |
| Shell 2 - Pot                | -1,230.18 | -2,258.88 | -201.49  | 325.14 | -3.78   | 0.01**  |
| Fabric Plant - Pot           | -691.33   | -1,720.03 | 337.36   | 325.14 | -2.13   |         |
| Plastic Plant - Pot          | -1,129.21 | -2,157.91 | -100.52  | 325.14 | -3.47   | 0.02*   |
| Blue - Spoon                 | -356.48   | -1,385.18 | 672.21   | 325.14 | -1.10   |         |
| Green - Spoon                | -609.94   | -1,638.64 | 418.76   | 325.14 | -1.88   |         |
| Plant 1 - Spoon              | 126.73    | -901.97   | 1,155.42 | 325.14 | 0.39    |         |
| Plant 2 - Spoon              | -405.94   | -1,434.64 | 622.76   | 325.14 | -1.25   |         |
| Shell 1 - Spoon              | -189.58   | -1,218.27 | 839.12   | 325.14 | -0.58   |         |
| Shell 2 - Spoon              | -636.73   | -1,665.42 | 391.97   | 325.14 | -1.96   |         |
| Fabric Plant - Spoon         | -97.88    | -1,126.57 | 930.82   | 325.14 | -0.30   |         |
| Plastic Plant - Spoon        | -535.76   | -1,564.45 | 492.94   | 325.14 | -1.65   |         |
| Green - Blue                 | -253.45   | -1,282.15 | 775.24   | 325.14 | -0.78   |         |
| Plant 1 - Blue               | 483.21    | -545.48   | 1,511.91 | 325.14 | 1.49    |         |
| Plant 2 - Blue               | -49.45    | -1,078.15 | 979.24   | 325.14 | -0.15   |         |
| Shell 1 - Blue               | 166.91    | -861.79   | 1,195.61 | 325.14 | 0.51    |         |
| Shell 2 - Blue               | -280.24   | -1,308.94 | 748.45   | 325.14 | -0.86   |         |
| Fabric Plant - Blue          | 258.61    | -770.09   | 1,287.30 | 325.14 | 0.80    |         |
| Plastic Plant - Blue         | -179.27   | -1,207.97 | 849.42   | 325.14 | -0.55   |         |
| Plant 1 - Green              | 736.67    | -292.03   | 1,765.36 | 325.14 | 2.27    |         |
| Plant 2 - Green              | 204       | -824.70   | 1,232.70 | 325.14 | 0.63    |         |
| Shell 1 - Green              | 420.36    | -608.33   | 1,449.06 | 325.14 | 1.29    |         |
| Shell 2 - Green              | -26.79    | -1,055.48 | 1,001.91 | 325.14 | -0.08   |         |
| Fabric Plant - Green         | 512.06    | -516.64   | 1,540.76 | 325.14 | 1.57    |         |
| Plastic Plant - Green        | 74.18     | -954.51   | 1,102.88 | 325.14 | 0.23    |         |
| Plant 2 - Plant 1            | -532.67   | -1,561.36 | 496.03   | 325.14 | -1.64   |         |
| Shell 1 - Plant 1            | -316.30   | -1,345    | 712.39   | 325.14 | -0.97   |         |
| Shell 2 - Plant 1            | -763.45   | -1,792.15 | 265.24   | 325.14 | -2.35   |         |
| Fabric Plant - Plant 1       | -224.61   | -1,253.30 | 804.09   | 325.14 | -0.69   |         |
| Plastic Plant - Plant 1      | -662.48   | -1,691.18 | 366.21   | 325.14 | -2.04   |         |
| Shell 1 - Plant 2            | 216.36    | -812.33   | 1,245.06 | 325.14 | 0.67    |         |
| Shell 2 - Plant 2            | -230.79   | -1,259.48 | 797.91   | 325.14 | -0.71   |         |
| Fabric Plant - Plant 2       | 308.06    | -720.64   | 1,336.76 | 325.14 | 0.95    |         |
| Plastic Plant - Plant 2      | -129.82   | -1,158.51 | 898.88   | 325.14 | -0.40   |         |
| Shell 2 - Shell 1            | -447.15   | -1,475.85 | 581.54   | 325.14 | -1.38   |         |
| Fabric Plant - Shell 1       | 91.70     | -937      | 1,120.39 | 325.14 | 0.28    |         |
| Plastic Plant - Shell 1      | -346.18   | -1,374.88 | 682.51   | 325.14 | -1.06   |         |
| Fabric Plant - Shell 2       | 538.85    | -489.85   | 1,567.54 | 325.14 | 1.66    |         |
| Plastic Plant - Shell 2      | 100.97    | -927.73   | 1,129.67 | 325.14 | 0.31    |         |
| Plastic Plant - Fabric Plant | -437.88   | -1,466.57 | 590.82   | 325.14 | -1.35   |         |

Table S5 Tukey's all-pair comparisons for estimates (ms) of duration of social looking across objects. The only significant differences are longer social looking durations for Pot vs. Green Novel Artificial, Shell 2 (nautilus), and the Plastic Artificial Plant

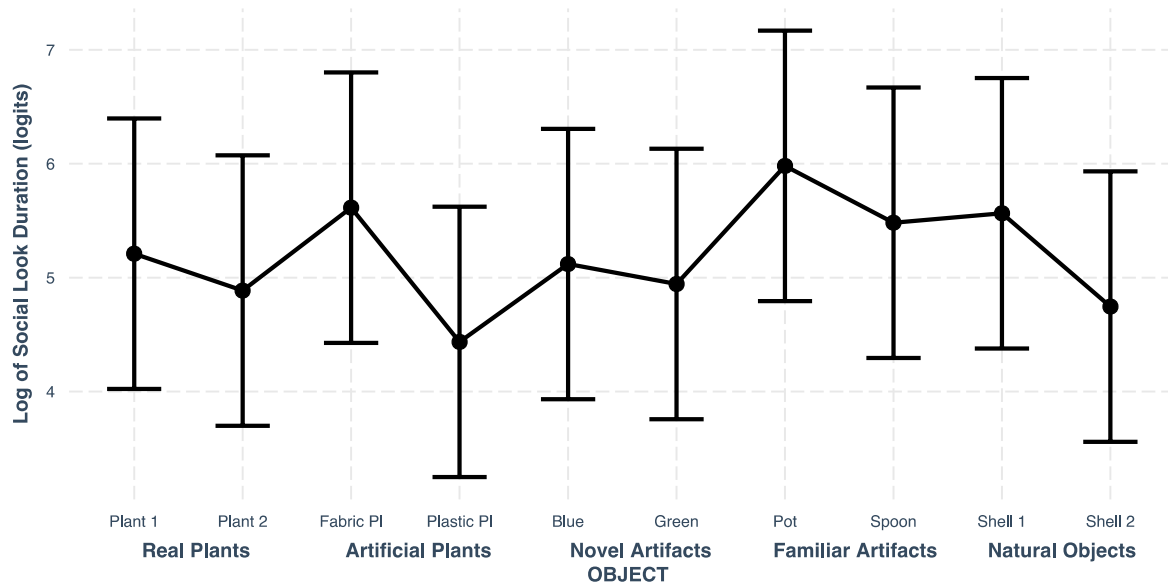

Figure S3 Least squares means of Log Transform Social Look Duration across objects. Error bars show .95 CI. Tukey's all-pair comparisons do not reveal any significant differences.

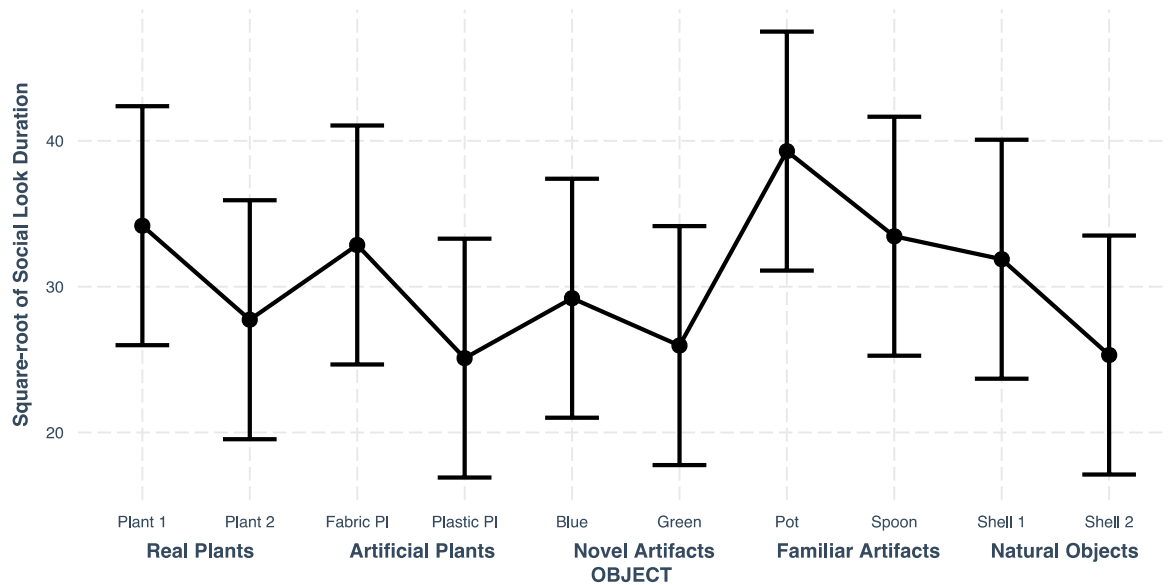

Figure S4 Least squares means of Square Root Transform Social Look Duration across objects. Error bars show .95 CI. Tukey's all-pair comparisons reveal only marginally longer social looking in the Pot trials vs. the Plastic Artificial Plant trials (Pot – Plastic = -14.19,  $SE = 4.79$ ,  $p = 0.0885$ ).

|                             | Social Look Duration (ms)                                |                                                   |                                                         |
|-----------------------------|----------------------------------------------------------|---------------------------------------------------|---------------------------------------------------------|
|                             | <u>Untransformed</u><br><i>Estimate (raw)</i><br>[.95CI] | <u>Log</u><br><i>Estimate (logits)</i><br>[.95CI] | <u>Square Root</u><br><i>Estimate (sqrt)</i><br>[.95CI] |
| Plant 1: Coconut Palm       | 1,842.18***<br>[1,295.88, 2,388.48]                      | 5.21***<br>[4.03, 6.39]                           | 34.18***<br>[26.02, 42.34]                              |
| Plant 2: Mango Tree         | -532.67<br>[-1,169.93, 104.59]                           | 4.89***<br>[3.70, 6.07]                           | 27.74***<br>[19.58, 35.90]                              |
| Artificial Plant: Fabric    | -224.61<br>[-861.87, 412.65]                             | 5.61***<br>[4.43, 6.80]                           | 32.86***<br>[24.70, 41.02]                              |
| Artificial Plant: Plastic   | -662.48*<br>[-1,299.74, -25.22]                          | 4.44***<br>[3.25, 5.62]                           | 25.10***<br>[16.94, 33.26]                              |
| Novel Artificial: Blue      | -483.21<br>[-1,120.47, 154.05]                           | 5.12***<br>[3.94, 6.30]                           | 29.21***<br>[21.05, 37.37]                              |
| Novel Artificial: Green     | -736.67*<br>[-1,373.93, -99.41]                          | 4.94***<br>[3.76, 6.13]                           | 25.96***<br>[17.80, 34.12]                              |
| Familiar Artificial: Pot    | 466.73<br>[-170.53, 1,103.99]                            | 5.98***<br>[4.80, 7.16]                           | 39.29***<br>[31.13, 47.45]                              |
| Familiar Artificial: Spoon  | -126.73<br>[-763.99, 510.53]                             | 5.48***<br>[4.30, 6.67]                           | 33.46***<br>[25.29, 41.62]                              |
| Shell 1: Conch              | -316.30<br>[-953.56, 320.96]                             | 5.57***<br>[4.38, 6.75]                           | 31.88***<br>[23.72, 40.04]                              |
| Shell 2: Nautilus           | -763.45*<br>[-1,400.71, -126.19]                         | 4.75***<br>[3.56, 5.93]                           | 25.32***<br>[17.16, 33.48]                              |
| Observations                | 330                                                      | 330                                               | 330                                                     |
| Shapiro-Wilk Normality Test | 0.94***                                                  | 0.93***                                           | 0.98**                                                  |
| Log Likelihood              | -2,798.88                                                | -839.14                                           | -1,450.16                                               |
| Akaike Inf. Crit.           | 5,621.77                                                 | 1,702.29                                          | 2,924.31                                                |
| Bayesian Inf. Crit.         | 5,667.35                                                 | 1,747.88                                          | 2,969.90                                                |

Note: †p<0.1; \*p<0.05; \*\*p<0.01; \*\*\*p<0.001

Table S6 Comparison between untransformed raw latencies vs log and square-root transformations for Hypothesis 3.

| Coef                       | Untransformed Latency<br>Estimate (SE)          | Robust Regression<br>Estimate (SE) |
|----------------------------|-------------------------------------------------|------------------------------------|
| (Intercept) Plant 1        | 1842 (279)                                      | 1642 (242)                         |
| Plant 1 v. Plant 2         | -533 (325)                                      | -574 (290)                         |
| Plant 1 v. Fabric Plant    | -225 (325)                                      | -339 (290)                         |
| Plant 1 v. Plastic Plant   | -662 (325)                                      | -677 (290)                         |
| Plant 1 v. Blue            | -483 (325)                                      | -433 (290)                         |
| Plant 1 v. Green           | -737 (325)                                      | -666 (290)                         |
| Plant 1 v. Pot             | 467 (325)                                       | 248 (290)                          |
| Plant 1 v. Spoon           | -127 (325)                                      | -214 (290)                         |
| Plant 1 v. Shell 1         | -316 (325)                                      | -340 (290)                         |
| Plant 1 v. Shell 2         | -763 (325)                                      | -724 (290)                         |
| <u>Variance Components</u> |                                                 |                                    |
| (Intercept) Individuals    | 905                                             | 712                                |
| sigma                      | 1321                                            | 1150                               |
| REML                       | 5598                                            |                                    |
| rho.e                      | smoothed Huber (k = 1.345, s = 10)              |                                    |
| rho.sigma.e                | smoothed Huber, Proposal II (k = 1.345, s = 10) |                                    |
| rho.b 1                    | smoothed Huber (k = 1.345, s = 10)              |                                    |
| rho.sigma.b 1              | smoothed Huber, Proposal II (k = 1.345, s = 10) |                                    |

Table S7 Comparison between untransformed raw durations of social looking and robust hierarchical regression for Hypothesis 3.

## **S5. Correlations between Touch Latency, Social Look Duration, and Caregiver**

### **Interviews**

#### **S5.1. Caregiver Interview Items**

1-5 Interview questions: [1=never; 5= everyday]

1. Intro\_1 = How often does your child go to the plantation?
2. Intro\_2 = How often is your child out of house?
3. Post\_6 = How often does your child interact with plants? \_1to5
4. Post\_7 = How often do you name plants to your child? \_1to5
5. Post\_8 = How often does your child see you care for plants? \_1to5
6. Post\_9 = How often does your child eat fruit directly from plant? \_1to5
7. Post\_10 = How often does your child touch plants on farm? \_1to5
8. Post\_11 = How often does your child touch plants in the bush? \_1to5
9. Post\_12 = How often do you stop your child from touching plants? \_1to5
10. Post\_14 = How often do you stop your child from touching things? \_1to5

1-5 Interview questions: [1=a bit; 5= a lot]

11. Post\_16 = How active is your child? \_1to5
12. Post\_17 = How fearful/ shy is your child? \_1to5
13. Post\_18 = How much can your child keep his attention on a single object (for example, while watching or playing)? \_1to5
14. Post\_19 = How much your child notices small changes in their environment? \_1to5
15. Post\_20 = How fast your child approaches things he / she thinks are interesting? \_1to5

Items assessing touch stimuli familiarity “Has your child seen xx before? Y/N”:

16. Plant 1 Seen\_Y.1 = Familiar with Plant 1 (coconut palm); yes coded as 1, higher values = familiarity
17. Plant 2 Seen\_Y.1 = Familiar with Plant 2 (mango); yes coded as 1, higher values = familiarity
18. Fake Fabric Seen\_Y.1 = Familiar with Fabric Plant; yes coded as 1, higher values = familiarity
19. Fake Plastic Seen\_Y.1 = Familiar with Plastic Plant; yes coded as 1, higher values = familiarity
20. Blue Art Seen\_Y.1 = Familiar with Blue Novel Artifact; yes coded as 1, higher values = familiarity
21. Green Art Seen\_Y.1 = Familiar with Green Novel Artifact; yes coded as 1, higher values = familiarity
22. Pot Seen\_Y.1 = Familiar with Pot (familiar artifact); yes coded as 1, higher values = familiarity
23. Spoon Seen\_Y.1 = Familiar with Spoon (familiar artifact); yes coded as 1, higher values = familiarity
24. Shell 1 Seen\_Y.1 = Familiar with Shell 1 (Conch); yes coded as 1, higher values = familiarity
25. Shell 2 Seen\_Y.1 = Familiar with Shell 2 (Nautilus); yes coded as 1, higher values = familiarity

**S5.2. Stimulus item familiarity**

N=32

| Item                     | Seen before: No | Seen before: Yes |
|--------------------------|-----------------|------------------|
| Plant 1                  | 1               | 31               |
| Plant 2                  | 11              | 21               |
| Artificial Fabric Plant  | 19              | 13               |
| Artificial Plastic Plant | 22              | 10               |
| Blue Artifact            | 29              | 3                |
| Green Artifact           | 26              | 6                |
| Pot                      | 1               | 31               |
| Spoon                    | 1               | 31               |
| Shell 1                  | 8               | 24               |
| Shell 2                  | 16              | 16               |

*Table 8.* Participating Children’s familiarity with stimulus items based upon caregiver interviews.

**S5.3. Correlation Tables**

|               | Touch latency | Social Look | Intro_1  | Intro_2  | Post_6  | Post_7   | Post_8   | Post_9  | Post_10  | Post_11  | Post_12 | Post_14  | Post_16 | Post_17  | Post_18 | Post_19 |
|---------------|---------------|-------------|----------|----------|---------|----------|----------|---------|----------|----------|---------|----------|---------|----------|---------|---------|
| Touch latency |               |             |          |          |         |          |          |         |          |          |         |          |         |          |         |         |
| Social Look   | 0.20***       |             |          |          |         |          |          |         |          |          |         |          |         |          |         |         |
| Intro_1       | -0.06         | 0.15**      |          |          |         |          |          |         |          |          |         |          |         |          |         |         |
| Intro_2       | 0.32***       | 0.12*       | 0.31***  |          |         |          |          |         |          |          |         |          |         |          |         |         |
| Post_6        | -0.13*        | 0.04        | -0.03    | -0.04    |         |          |          |         |          |          |         |          |         |          |         |         |
| Post_7        | -0.06         | 0.05        | 0.16**   | 0.16**   | 0.21*** |          |          |         |          |          |         |          |         |          |         |         |
| Post_8        | -0.36***      | 0.05        | 0.32***  | 0.03     | 0.22*** | 0.29***  |          |         |          |          |         |          |         |          |         |         |
| Post_9        | -0.07         | 0.00        | -0.01    | -0.06    | 0.11*   | -0.15**  | 0.04     |         |          |          |         |          |         |          |         |         |
| Post_10       | 0.18**        | -0.02       | -0.35*** | 0.07     | -0.05   | 0.22***  | -0.03    | 0.18**  |          |          |         |          |         |          |         |         |
| Post_11       | -0.04         | 0.00        | -0.31*** | 0.02     | 0.08    | -0.02    | 0.31***  | 0.17**  | 0.26***  |          |         |          |         |          |         |         |
| Post_12       | 0.07          | 0.13*       | -0.21*** | 0.22***  | 0.45*** | 0.01     | -0.04    | -0.06   | 0.24***  | 0.40***  |         |          |         |          |         |         |
| Post_14       | 0.05          | 0.00        | -0.36*** | -0.23*** | -0.04   | 0.20***  | -0.39*** | 0.09    | 0.00     | 0.15**   | 0.09    |          |         |          |         |         |
| Post_16       | -0.07         | 0.04        | -0.15**  | 0.15**   | 0.14*   | -0.24*** | -0.01    | 0.19*** | -0.06    | 0.25***  | 0.17**  | -0.19*** |         |          |         |         |
| Post_17       | -0.20***      | 0.07        | 0.19***  | -0.15**  | 0.16**  | -0.07    | 0.17**   | 0.00    | -0.46*** | -0.19*** | -0.02   | -0.06    | 0.07    |          |         |         |
| Post_18       | -0.03         | 0.10        | 0.27***  | -0.01    | -0.02   | -0.35*** | -0.07    | -0.06   | -0.17**  | -0.01    | 0.13*   | -0.31*** | 0.12*   | 0.09     |         |         |
| Post_19       | -0.08         | -0.07       | 0.09     | 0.09     | 0.15*   | 0.24***  | -0.05    | 0.37*** | 0.23***  | 0.23***  | 0.09    | 0.47***  | -0.07   | -0.28*** | -0.11   |         |
| Post_20       | -0.12*        | -0.01       | -0.19*** | 0.06     | 0.22*** | -0.15**  | 0.18**   | 0.08    | -0.09    | 0.25***  | 0.19*** | -0.10    | 0.46*** | 0.37***  | -0.03   | 0.17**  |

†p<0.1; \*p<0.05; \*\*p<0.01; \*\*\*p<0.001

Table S9 Correlations between Touch Latency, Social Look Duration, and Caregiver Interview 2 items answered on a 1-5 scale.



Supplementary Online Materials: McNamara & Wertz (2021). Early Plant Learning in Fiji

|                       | Touch latency | Social Look | Plant 1 Seen_Y.1 | Plant 2 Seen_Y.1 | Fake Fabric Seen_Y.1 | Fake Plastic Seen_Y.1 | Blue Art Seen_Y.1 | Green Art Seen_Y.1 | Pot Seen_Y.1 | Spoon Seen_Y.1 | Shell 1 Seen_Y.1 |
|-----------------------|---------------|-------------|------------------|------------------|----------------------|-----------------------|-------------------|--------------------|--------------|----------------|------------------|
| Touch latency         |               |             |                  |                  |                      |                       |                   |                    |              |                |                  |
| Social Look           | 0.20* * *     |             |                  |                  |                      |                       |                   |                    |              |                |                  |
| Plant 1 Seen_Y.1      | 0.14*         | -0.06       |                  |                  |                      |                       |                   |                    |              |                |                  |
| Plant 2 Seen_Y.1      | -0.11         | 0.14*       | 0.25* * *        |                  |                      |                       |                   |                    |              |                |                  |
| Fake Fabric Seen_Y.1  | -0.12*        | -0.01       | -0.22* * *       | 0.06             |                      |                       |                   |                    |              |                |                  |
| Fake Plastic Seen_Y.1 | -0.14*        | 0.12*       | -0.27* * *       | 0.06             | 0.27* * *            |                       |                   |                    |              |                |                  |
| Blue Art Seen_Y.1     | -0.21* * *    | -0.01       | 0.06             | 0.23* * *        | -0.05                | 0.01                  |                   |                    |              |                |                  |
| Green Art Seen_Y.1    | -0.09         | 0.07        | 0.09             | 0.18* *          | 0.25* * *            | 0.37* * *             | 0.12*             |                    |              |                |                  |
| Pot Seen_Y.1          | -0.17* *      | 0.04        | -0.03            | 0.25* * *        | 0.15* *              | 0.12*                 | 0.06              | 0.09               |              |                |                  |
| Spoon Seen_Y.1        | -0.17* *      | 0.04        | -0.03            | 0.25* * *        | 0.15* *              | 0.12*                 | 0.06              | 0.09               | 1.00* * *    |                |                  |
| Shell 1 Seen_Y.1      | -0.13*        | -0.03       | 0.31* * *        | 0.19* * *        | 0.04                 | -0.08                 | 0.19* * *         | 0.28* * *          | -0.10        | -0.10          |                  |
| Shell 2 Seen_Y.1      | -0.07         | 0.11*       | 0.18* *          | 0.33* * *        | 0.06                 | -0.13*                | 0.11              | 0.16* *            | -0.18* *     | -0.18* *       | 0.58* * *        |

†p<0.1; \*p<0.05; \*\*p<0.01; \*\*\*p<0.001

Table S10 Correlations between Touch Latency, Social Look Duration, and Caregiver Interview 2 items assessing familiarity with touch stimuli items on a y/n scale (yes =1; negative values indicate longer latency/ duration with more familiarity).

Supplementary Online Materials: McNamara & Wertz (2021). Early Plant Learning in Fiji

|               | Touch latency | Social Look | Intro_1  | Intro_2 | Post_6  | Post_7   | Post_8   | Post_9  | Post_10  | Post_11 | Post_12 | Post_14  | Post_16 | Post_17 | Post_18 | Post_19 |
|---------------|---------------|-------------|----------|---------|---------|----------|----------|---------|----------|---------|---------|----------|---------|---------|---------|---------|
| Touch latency |               |             |          |         |         |          |          |         |          |         |         |          |         |         |         |         |
| Social Look   | 0.14          |             |          |         |         |          |          |         |          |         |         |          |         |         |         |         |
| Intro_1       | 0.01          | 0.18*       |          |         |         |          |          |         |          |         |         |          |         |         |         |         |
| Intro_2       | 0.32***       | 0.11        | 0.31***  |         |         |          |          |         |          |         |         |          |         |         |         |         |
| Post_6        | -0.18*        | 0.01        | -0.03    | -0.04   |         |          |          |         |          |         |         |          |         |         |         |         |
| Post_7        | -0.16         | 0.10        | 0.16     | 0.16    | 0.21*   |          |          |         |          |         |         |          |         |         |         |         |
| Post_8        | -0.32***      | 0.09        | 0.32***  | 0.03    | 0.22*   | 0.29***  |          |         |          |         |         |          |         |         |         |         |
| Post_9        | -0.05         | 0.05        | -0.01    | -0.06   | 0.11    | -0.15    | 0.04     |         |          |         |         |          |         |         |         |         |
| Post_10       | 0.14          | 0.02        | -0.35*** | 0.07    | -0.05   | 0.22*    | -0.03    | 0.18*   |          |         |         |          |         |         |         |         |
| Post_11       | -0.09         | 0.01        | -0.31*** | 0.02    | 0.08    | -0.02    | 0.31***  | 0.17    | 0.26**   |         |         |          |         |         |         |         |
| Post_12       | 0.06          | 0.13        | -0.21*   | 0.22*   | 0.45*** | 0.01     | -0.04    | -0.06   | 0.24**   | 0.40*** |         |          |         |         |         |         |
| Post_14       | -0.05         | -0.09       | -0.36*** | -0.23*  | -0.04   | 0.20*    | -0.39*** | 0.09    | 0.00     | 0.15    | 0.09    |          |         |         |         |         |
| Post_16       | -0.03         | 0.03        | -0.15    | 0.15    | 0.14    | -0.24**  | -0.01    | 0.19*   | -0.06    | 0.25**  | 0.17*   | -0.19*   |         |         |         |         |
| Post_17       | -0.08         | 0.06        | 0.19*    | -0.15   | 0.16    | -0.07    | 0.17     | 0.00    | -0.46*** | -0.19*  | -0.02   | -0.06    | 0.07    |         |         |         |
| Post_18       | -0.01         | 0.08        | 0.27**   | -0.01   | -0.02   | -0.35*** | -0.07    | -0.06   | -0.17    | -0.01   | 0.13    | -0.31*** | 0.12    | 0.09    |         |         |
| Post_19       | -0.13         | -0.12       | 0.09     | 0.09    | 0.15    | 0.24**   | -0.05    | 0.37*** | 0.23*    | 0.23*   | 0.09    | 0.47***  | -0.07   | -0.28** | -0.11   |         |
| Post_20       | -0.11         | -0.07       | -0.19*   | 0.06    | 0.22*   | -0.15    | 0.18*    | 0.08    | -0.09    | 0.25**  | 0.19*   | -0.10    | 0.46*** | 0.37*** | -0.03   | 0.17    |

\*p<0.1; \*\*p<0.05; \*\*\*p<0.01; \*\*\*\*p<0.001

Table S11 Correlations between Touch Latency (Real & Artificial Plants only), Social Look Duration (Real & Artificial Plants only), and Caregiver Interview items answered on a 1-5 scale.

Supplementary Online Materials: McNamara & Wertz (2021). Early Plant Learning in Fiji

|                       | Touch latency | Social Look | Plant 1 Seen_Y.1 | Plant 2 Seen_Y.1 | Fake Fabric Seen_Y.1 | Fake Plastic Seen_Y.1 | Blue Art Seen_Y.1 | Green Art Seen_Y.1 | Pot Seen_Y.1 | Spoon Seen_Y.1 | Shell 1 Seen_Y.1 |
|-----------------------|---------------|-------------|------------------|------------------|----------------------|-----------------------|-------------------|--------------------|--------------|----------------|------------------|
| Touch latency         |               |             |                  |                  |                      |                       |                   |                    |              |                |                  |
| Social Look           | 0.14          |             |                  |                  |                      |                       |                   |                    |              |                |                  |
| Plant 1 Seen_Y.1      | -0.13         | 0.12        |                  |                  |                      |                       |                   |                    |              |                |                  |
| Plant 2 Seen_Y.1      | 0.17          | -0.06       | 0.25* *          |                  |                      |                       |                   |                    |              |                |                  |
| Fake Fabric Seen_Y.1  | -0.19*        | 0.10        | 0.06             | -0.27* *         |                      |                       |                   |                    |              |                |                  |
| Fake Plastic Seen_Y.1 | -0.16         | -0.07       | 0.06             | -0.22*           | 0.27* *              |                       |                   |                    |              |                |                  |
| Blue Art Seen_Y.1     | -0.12         | 0.00        | 0.18*            | 0.09             | 0.37* * *            | 0.25* *               |                   |                    |              |                |                  |
| Green Art Seen_Y.1    | -0.11         | 0.08        | 0.23* *          | 0.06             | 0.01                 | -0.05                 | 0.12              |                    |              |                |                  |
| Pot Seen_Y.1          | -0.17         | 0.08        | 0.25* *          | -0.03            | 0.12                 | 0.15                  | 0.09              | 0.06               |              |                |                  |
| Spoon Seen_Y.1        | -0.17         | 0.08        | 0.25* *          | -0.03            | 0.12                 | 0.15                  | 0.09              | 0.06               | 1.00* * *    |                |                  |
| Shell 1 Seen_Y.1      | -0.07         | -0.06       | 0.19*            | 0.31* * *        | -0.08                | 0.04                  | 0.28* *           | 0.19*              | -0.10        | -0.10          |                  |
| Shell 2 Seen_Y.1      | 0.01          | 0.10        | 0.33* * *        | 0.18*            | -0.13                | 0.06                  | 0.16              | 0.11               | -0.18*       | -0.18*         | 0.58* * *        |

`p<0.1; \*p<0.05; \*\*p<0.01; \*\*\*p<0.001

Table S12 Correlations between total Touch Latency (Real & Artificial Plants only), Social Look Duration (Real & Artificial Plants only), and Caregiver Interview items assessing familiarity with touch stimuli items on a y/n scale (yes =1; negative values indicate longer latency/duration with more familiarity).

Supplementary Online Materials: McNamara & Wertz (2021). Early Plant Learning in Fiji

|                         | Touch latency | Social Look | Plant 1 Seen_Y.1 | Plant 2 Seen_Y.1 | Fake Fabric Seen_Y.1 | Fake Plastic Seen_Y.1 | Blue Art Seen_Y.1 | Green Art Seen_Y.1 | Pot Seen_Y.1 | Spoon Seen_Y.1 | Shell 1 Seen_Y.1 |
|-------------------------|---------------|-------------|------------------|------------------|----------------------|-----------------------|-------------------|--------------------|--------------|----------------|------------------|
| Touch latency           |               |             |                  |                  |                      |                       |                   |                    |              |                |                  |
| Social Look             | 0.19          |             |                  |                  |                      |                       |                   |                    |              |                |                  |
| <b>Plant 1 Seen_Y.1</b> | <b>-0.05</b>  | <b>0.19</b> |                  |                  |                      |                       |                   |                    |              |                |                  |
| <b>Plant 2 Seen_Y.1</b> | <b>0.17</b>   | <b>0.06</b> | 0.25*            |                  |                      |                       |                   |                    |              |                |                  |
| Fake Fabric Seen_Y.1    | -0.22         | -0.01       | 0.06             | -0.27*           |                      |                       |                   |                    |              |                |                  |
| Fake Plastic Seen_Y.1   | -0.14         | -0.04       | 0.06             | -0.22            | 0.27*                |                       |                   |                    |              |                |                  |
| Blue Art Seen_Y.1       | -0.17         | 0.13        | 0.18             | 0.09             | 0.37* *              | 0.25*                 |                   |                    |              |                |                  |
| Green Art Seen_Y.1      | -0.09         | 0.08        | 0.23             | 0.06             | 0.01                 | -0.05                 | 0.12              |                    |              |                |                  |
| Pot Seen_Y.1            | -0.20         | 0.13        | 0.25*            | -0.03            | 0.12                 | 0.15                  | 0.09              | 0.06               |              |                |                  |
| Spoon Seen_Y.1          | -0.20         | 0.13        | 0.25*            | -0.03            | 0.12                 | 0.15                  | 0.09              | 0.06               | 1.00* * *    |                |                  |
| Shell 1 Seen_Y.1        | -0.06         | 0.12        | 0.19             | 0.31*            | -0.08                | 0.04                  | 0.28*             | 0.19               | -0.10        | -0.10          |                  |
| Shell 2 Seen_Y.1        | 0.00          | 0.23        | 0.33* *          | 0.18             | -0.13                | 0.06                  | 0.16              | 0.11               | -0.18        | -0.18          | 0.58* * *        |

`p<0.1; \*p<0.05; \*\*p<0.01; \*\*\*p<0.001

Table S13 Correlations between total Touch Latency (Real Plants only), Social Look Duration (Real Plants only), and Caregiver Interview items assessing familiarity with touch stimuli items on a y/n scale (yes =1; negative values indicate longer latency/ duration with more familiarity).

Supplementary Online Materials: McNamara & Wertz (2021). Early Plant Learning in Fiji

|                              | Touch latency | Social Look  | Plant 1 Seen_Y.1 | Plant 2 Seen_Y.1 | Fake Fabric Seen_Y.1 | Fake Plastic Seen_Y.1 | Blue Art Seen_Y.1 | Green Art Seen_Y.1 | Pot Seen_Y.1 | Spoon Seen_Y.1 | Shell 1 Seen_Y.1 |
|------------------------------|---------------|--------------|------------------|------------------|----------------------|-----------------------|-------------------|--------------------|--------------|----------------|------------------|
| Touch latency                |               |              |                  |                  |                      |                       |                   |                    |              |                |                  |
| Social Look                  | 0.11          |              |                  |                  |                      |                       |                   |                    |              |                |                  |
| Plant 1 Seen_Y.1             | -0.23         | 0.06         |                  |                  |                      |                       |                   |                    |              |                |                  |
| Plant 2 Seen_Y.1             | 0.19          | -0.17        | 0.25*            |                  |                      |                       |                   |                    |              |                |                  |
| <b>Fake Fabric Seen_Y.1</b>  | <b>-0.17</b>  | <b>0.21</b>  | 0.06             | -0.27*           |                      |                       |                   |                    |              |                |                  |
| <b>Fake Plastic Seen_Y.1</b> | <b>-0.19</b>  | <b>-0.10</b> | 0.06             | -0.22            | 0.27*                |                       |                   |                    |              |                |                  |
| Blue Art Seen_Y.1            | -0.06         | -0.13        | 0.18             | 0.09             | 0.37* *              | 0.25*                 |                   |                    |              |                |                  |
| Green Art Seen_Y.1           | -0.14         | 0.07         | 0.23             | 0.06             | 0.01                 | -0.05                 | 0.12              |                    |              |                |                  |
| Pot Seen_Y.1                 | -0.15         | 0.03         | 0.25*            | -0.03            | 0.12                 | 0.15                  | 0.09              | 0.06               |              |                |                  |
| Spoon Seen_Y.1               | -0.15         | 0.03         | 0.25*            | -0.03            | 0.12                 | 0.15                  | 0.09              | 0.06               | 1.00* * *    |                |                  |
| Shell 1 Seen_Y.1             | -0.10         | -0.23        | 0.19             | 0.31*            | -0.08                | 0.04                  | 0.28*             | 0.19               | -0.10        | -0.10          |                  |
| Shell 2 Seen_Y.1             | 0.03          | -0.03        | 0.33* *          | 0.18             | -0.13                | 0.06                  | 0.16              | 0.11               | -0.18        | -0.18          | 0.58* * *        |

`p<0.1; \*p<0.05; \*\*p<0.01; \*\*\*p<0.001

Table S14 Correlations between total Touch Latency (Artificial Plants only), Social Look Duration (Artificial Plants only), and Caregiver Interview items assessing familiarity with touch stimuli items on a y/n scale (yes =1; negative values indicate longer latency/ duration with more familiarity).

Supplementary Online Materials: McNamara & Wertz (2021). Early Plant Learning in Fiji

|                           | Touch latency  | Social Look | Plant 1 Seen_Y.1 | Plant 2 Seen_Y.1 | Fake Fabric Seen_Y.1 | Fake Plastic Seen_Y.1 | Blue Art Seen_Y.1 | Green Art Seen_Y.1 | Pot Seen_Y.1 | Spoon Seen_Y.1 | Shell 1 Seen_Y.1 |
|---------------------------|----------------|-------------|------------------|------------------|----------------------|-----------------------|-------------------|--------------------|--------------|----------------|------------------|
| Touch latency             |                |             |                  |                  |                      |                       |                   |                    |              |                |                  |
| Social Look               | 0.29*          |             |                  |                  |                      |                       |                   |                    |              |                |                  |
| Plant 1 Seen_Y.1          | -0.09          | -0.01       |                  |                  |                      |                       |                   |                    |              |                |                  |
| Plant 2 Seen_Y.1          | 0.14           | -0.18       | 0.25*            |                  |                      |                       |                   |                    |              |                |                  |
| Fake Fabric Seen_Y.1      | -0.12          | 0.07        | 0.06             | -0.27*           |                      |                       |                   |                    |              |                |                  |
| Fake Plastic Seen_Y.1     | -0.04          | 0.04        | 0.06             | -0.22            | 0.27*                |                       |                   |                    |              |                |                  |
| <b>Blue Art Seen_Y.1</b>  | <b>-0.07</b>   | <b>0.00</b> | 0.18             | 0.09             | 0.37* *              | 0.25*                 |                   |                    |              |                |                  |
| <b>Green Art Seen_Y.1</b> | <b>-0.38**</b> | <b>0.02</b> | 0.23             | 0.06             | 0.01                 | -0.05                 | 0.12              |                    |              |                |                  |
| Pot Seen_Y.1              | -0.16          | -0.05       | 0.25*            | -0.03            | 0.12                 | 0.15                  | 0.09              | 0.06               |              |                |                  |
| Spoon Seen_Y.1            | -0.16          | -0.05       | 0.25*            | -0.03            | 0.12                 | 0.15                  | 0.09              | 0.06               | 1.00* * *    |                |                  |
| Shell 1 Seen_Y.1          | -0.17          | -0.09       | 0.19             | 0.31*            | -0.08                | 0.04                  | 0.28*             | 0.19               | -0.10        | -0.10          |                  |
| Shell 2 Seen_Y.1          | -0.07          | 0.17        | 0.33* *          | 0.18             | -0.13                | 0.06                  | 0.16              | 0.11               | -0.18        | -0.18          | 0.58* * *        |

`p<0.1; \*p<0.05; \*\*p<0.01; \*\*\*p<0.001

Table S15 Correlations between total Touch Latency (Novel Artifacts only), Social Look Duration (Novel Artifacts only), and Caregiver Interview items assessing familiarity with touch stimuli items on a y/n scale (yes =1; negative values indicate longer latency/ duration with more familiarity).

|                  | Touch latency | Social Look | Plant 1 Seen_Y.1 | Plant 2 Seen_Y.1 | Fake Fabric Seen_Y.1 | Fake Plastic Seen_Y.1 | Blue Art Seen_Y.1 | Green Art Seen_Y.1 | Pot Seen_Y.1 | Spoon Seen_Y.1 | Shell 1 Seen_Y.1 |
|------------------|---------------|-------------|------------------|------------------|----------------------|-----------------------|-------------------|--------------------|--------------|----------------|------------------|
| Touch latency    |               |             |                  |                  |                      |                       |                   |                    |              |                |                  |
| Social Look      | 0.27*         |             |                  |                  |                      |                       |                   |                    |              |                |                  |
| Plant 1 Seen_Y.1 | -0.06         | 0.28*       |                  |                  |                      |                       |                   |                    |              |                |                  |
| Plant 2 Seen_Y.1 | 0.16          | 0.00        | 0.25*            |                  |                      |                       |                   |                    |              |                |                  |

Supplementary Online Materials: McNamara & Wertz (2021). Early Plant Learning in Fiji

|                       |              |             |         |        |         |       |       |      |           |       |           |
|-----------------------|--------------|-------------|---------|--------|---------|-------|-------|------|-----------|-------|-----------|
| Fake Fabric Seen_Y.1  | -0.10        | 0.12        | 0.06    | -0.27* |         |       |       |      |           |       |           |
| Fake Plastic Seen_Y.1 | -0.03        | 0.00        | 0.06    | -0.22  | 0.27*   |       |       |      |           |       |           |
| Blue Art Seen_Y.1     | 0.01         | 0.10        | 0.18    | 0.09   | 0.37* * | 0.25* |       |      |           |       |           |
| Green Art Seen_Y.1    | -0.13        | -0.16       | 0.23    | 0.06   | 0.01    | -0.05 | 0.12  |      |           |       |           |
| <b>Pot Seen_Y.1</b>   | <b>-0.19</b> | <b>0.00</b> | 0.25*   | -0.03  | 0.12    | 0.15  | 0.09  | 0.06 |           |       |           |
| <b>Spoon Seen_Y.1</b> | <b>-0.19</b> | <b>0.00</b> | 0.25*   | -0.03  | 0.12    | 0.15  | 0.09  | 0.06 | 1.00* * * |       |           |
| Shell 1 Seen_Y.1      | -0.10        | 0.06        | 0.19    | 0.31*  | -0.08   | 0.04  | 0.28* | 0.19 | -0.10     | -0.10 |           |
| Shell 2 Seen_Y.1      | -0.10        | 0.09        | 0.33* * | 0.18   | -0.13   | 0.06  | 0.16  | 0.11 | -0.18     | -0.18 | 0.58* * * |

`p<0.1; \*p<0.05; \*\*p<0.01; \*\*\*p<0.001

Table S16 Correlations between total Touch Latency (Familiar Artifacts only), Social Look Duration (Familiar Artifacts only), and Caregiver Interview items assessing familiarity with touch stimuli items on a y/n scale (yes =1; negative values indicate longer latency/ duration with more familiarity).

Supplementary Online Materials: McNamara & Wertz (2021). Early Plant Learning in Fiji

|                         | Touch latency | Social Look  | Plant 1 Seen_Y.1 | Plant 2 Seen_Y.1 | Fake Fabric Seen_Y.1 | Fake Plastic Seen_Y.1 | Blue Art Seen_Y.1 | Green Art Seen_Y.1 | Pot Seen_Y.1 | Spoon Seen_Y.1 | Shell 1 Seen_Y.1 |
|-------------------------|---------------|--------------|------------------|------------------|----------------------|-----------------------|-------------------|--------------------|--------------|----------------|------------------|
| Touch latency           |               |              |                  |                  |                      |                       |                   |                    |              |                |                  |
| Social Look             | 0.21          |              |                  |                  |                      |                       |                   |                    |              |                |                  |
| Plant 1 Seen_Y.1        | -0.12         | 0.15         |                  |                  |                      |                       |                   |                    |              |                |                  |
| Plant 2 Seen_Y.1        | 0.07          | -0.04        | 0.25*            |                  |                      |                       |                   |                    |              |                |                  |
| Fake Fabric Seen_Y.1    | -0.10         | 0.24         | 0.06             | -0.27*           |                      |                       |                   |                    |              |                |                  |
| Fake Plastic Seen_Y.1   | -0.21         | 0.05         | 0.06             | -0.22            | 0.27*                |                       |                   |                    |              |                |                  |
| Blue Art Seen_Y.1       | -0.16         | 0.25*        | 0.18             | 0.09             | 0.37* *              | 0.25*                 |                   |                    |              |                |                  |
| Green Art Seen_Y.1      | -0.29*        | -0.04        | 0.23             | 0.06             | 0.01                 | -0.05                 | 0.12              |                    |              |                |                  |
| Pot Seen_Y.1            | -0.17         | 0.13         | 0.25*            | -0.03            | 0.12                 | 0.15                  | 0.09              | 0.06               |              |                |                  |
| Spoon Seen_Y.1          | -0.17         | 0.13         | 0.25*            | -0.03            | 0.12                 | 0.15                  | 0.09              | 0.06               | 1.00* * *    |                |                  |
| <b>Shell 1 Seen_Y.1</b> | <b>-0.22</b>  | <b>-0.05</b> | 0.19             | 0.31*            | -0.08                | 0.04                  | 0.28*             | 0.19               | -0.10        | -0.10          |                  |
| <b>Shell 2 Seen_Y.1</b> | <b>-0.18</b>  | <b>0.14</b>  | 0.33* *          | 0.18             | -0.13                | 0.06                  | 0.16              | 0.11               | -0.18        | -0.18          | 0.58* * *        |

`p<0.1; \*p<0.05; \*\*p<0.01; \*\*\*p<0.001

Table S17 Correlations between total Touch Latency (Natural objects/ shells only), Social Look Duration (Natural objects/ shells only), and Caregiver Interview items assessing familiarity with touch stimuli items on a y/n scale (yes =1; negative values indicate longer latency/ duration with more familiarity).
